# Supplementary material for: Circulating blood extracellular vesicles as a tool to assess endothelial injury and chemotherapy toxicity in adjuvant cancer patients
Source: PubMed Central journal article supplement (PMC7591065; doi:10.1371/journal.pone.0240994), 2020-10-27
Supplement: pone.0240994.s004.pdf [file pone.0240994.s004.pdf]

**S1 Table.** EVs membrane antigens characteristics and parameters.

EVs in poor platelet plasma were isolated from blood samples of patients and HC by a series of centrifugations. EVs were labeled with fluorescent antibodies for membrane antigens characterized: endothelial cells (EC), white blood cells, coagulation proteins, and growth factor receptors.

| <b>EVs markers<br/>Mean, Median,<br/>quarrel range</b> | <b>HC-BC</b>                      | <b>BC I</b>                       | <b>BCII</b>                       | <b>HC-CC</b>                      | <b>CCI</b>                        | <b>CC II</b>                      | <b>One-way ANOVA,<br/>Bonferroni's Multiple<br/>Comparison Test,<br/>P-value</b> |
|--------------------------------------------------------|-----------------------------------|-----------------------------------|-----------------------------------|-----------------------------------|-----------------------------------|-----------------------------------|----------------------------------------------------------------------------------|
| <b>Cancer markers:</b><br>MUC1 (CD227)                 | 34.42<br>39.50<br>26.85-<br>41.40 | 44.88<br>50.25<br>24.85-<br>60.30 | 53.30<br>36.90<br>17.15-<br>60.20 | 27.73<br>28.40<br>18.10-<br>41.00 | 24.18<br>15.55<br>7.650-<br>41.55 | 29.63<br>24.30<br>11.20-<br>35.00 |                                                                                  |
| EPCAM                                                  | 3.295<br>3.800<br>0.400-<br>6.050 | 5.623<br>1.820<br>0.645-<br>8.500 | 7.647<br>1.080<br>0.370-<br>7.675 |                                   |                                   |                                   |                                                                                  |
| A33                                                    |                                   |                                   |                                   | 6.162<br>3.400<br>1.850-<br>11.15 | 18.31<br>8.050<br>3.800-<br>39.65 | 17.61<br>12.20<br>5.250-<br>27.00 |                                                                                  |
| <b>RBC: (CD253)</b>                                    | 47.05<br>51.30<br>40.70-<br>59.60 | 40.23<br>37.35<br>17.10-<br>64.70 | 40.79<br>32.00<br>14.10-<br>65.60 | 35.07<br>26.85<br>11.45-<br>52.45 | 53.48<br>57.10<br>43.45-<br>64.30 | 50.02<br>49.30<br>38.40-<br>64.80 |                                                                                  |
| <b>Platelet: ( CD41)</b>                               | 32.11<br>23.50<br>6.700-<br>50.55 | 16.12<br>11.89<br>2.765-<br>26.71 | 15.70<br>8.400<br>2.300-<br>24.00 | 16.78<br>11.20<br>4.800-<br>23.40 | 6.855<br>4.650<br>1.050-<br>11.75 | 11.34<br>8.850<br>4.450-<br>14.80 | HC for BC vs. BC I<br>and vs. BCII, P < 0.05                                     |

|                                                  |                                   |                                   |                                    |                                   |                                      |                                   |                                                                                                                         |
|--------------------------------------------------|-----------------------------------|-----------------------------------|------------------------------------|-----------------------------------|--------------------------------------|-----------------------------------|-------------------------------------------------------------------------------------------------------------------------|
| <b>Activated platelet:</b><br>(CD62P)            | 4.485<br>2.080<br>0.850-<br>5.350 | 4.353<br>1.430<br>0.505-<br>8.450 | 6.022<br>3.000<br>0.600-<br>9.300  | 4.373<br>4.400<br>0.0-<br>5.400   | 2.360<br>0.700<br>0<br>0.0-<br>2.150 | 3.090<br>1.150<br>0.0-<br>4.100   |                                                                                                                         |
| <b>Endothelial:</b><br>CD144                     | 23.46<br>25.00<br>5.550-<br>33.60 | 47.73<br>47.50<br>10.29-<br>79.30 | 56.13<br>58.00<br>31.30-<br>84.55  | 33.28<br>29.30<br>23.10-<br>47.75 | 48.79<br>52.40<br>32.20-<br>61.40    | 50.33<br>52.00<br>32.00-<br>63.20 | HC for BC vs BC II,<br>P < 0.01<br><br>HC for CC vs CCII, P<br>< 0.05                                                   |
| CD62E                                            | 9.520<br>7.600<br>3.750-<br>9.520 | 37.43<br>29.92<br>6.20-<br>37.43  | 32.85<br>21.80<br>4.700-<br>32.85  | 10.76<br>8.800<br>3.600-<br>10.76 | 9.786<br>8.400<br>1.700-<br>9.786    | 8.111<br>8.000<br>1.100-<br>10.60 | HC for BC vs:<br>BC I, P < 0.01, BC II, P<br>< 0.05<br><br>BC I vs CC I, P <<br>0.001<br><br>BC II vs CCII, P <<br>0.01 |
| CD31+41-                                         | 3.628<br>2.930<br>1.260-<br>5.200 | 12.11<br>5.300<br>2.300-<br>21.60 | 8.473<br>3.600<br>0.5900-<br>15.00 | 4.331<br>3.400<br>2.150-<br>6.600 | 10.78<br>6.100<br>3.800-<br>14.20    | 12.77<br>13.45<br>6.000-<br>18.50 | HC for CC vs CCII, P<br>< 0.05                                                                                          |
| <b>White blood cells</b><br>Leucocyte:<br>(CD11) | 4.681<br>3.250<br>1.550-<br>7.800 | 19.54<br>17.95<br>11.65-<br>28.20 | 14.56<br>9.750<br>4.700-<br>14.35  | 7.408<br>4.100<br>1.850-<br>9.00  | 4.526<br>3.100<br>0.0-<br>7.200      | 7.663<br>6.900<br>1.300-<br>8.300 | HC for BC vs:<br>BC I, P < 0.001; BC II,<br>P < 0.001<br><br>BC I vs CC I, P <<br>0.001                                 |
| Monocyte:<br>(CD14)                              | 12.36<br>12.60<br>5.900-<br>17.60 | 10.41<br>7.925<br>2.985-<br>13.41 | 8.835<br>5.175<br>1.530-<br>16.70  | 9.069<br>9.800<br>3.200-<br>14.60 | 4.013<br>1.700<br>0.0-<br>5.350      | 7.853<br>4.700<br>1.950-<br>9.650 | BC I vs CC I, P < 0.05                                                                                                  |
|                                                  | 7.950                             | 1.850                             | 1.810                              | 4.400                             | 0.650<br>0                           | 1.950                             |                                                                                                                         |
| <b>Coagulation :</b>                             | 17.98                             | 12.82                             | 16.03                              | 13.96                             | 6.238                                | 6.153                             |                                                                                                                         |

|                                                      |                                   |                                              |                                              |                                   |                                              |                                              |                                                                                                       |
|------------------------------------------------------|-----------------------------------|----------------------------------------------|----------------------------------------------|-----------------------------------|----------------------------------------------|----------------------------------------------|-------------------------------------------------------------------------------------------------------|
| Annexin V binding to negatively charged phospholipid | 12.50                             | 6.065                                        | 8.800                                        | 9.700                             | 4.600                                        | 4.700                                        |                                                                                                       |
| TF                                                   | 6.595<br>7.100<br>4.20-<br>8.470  | 19.95<br>12.92<br>6.765-<br>34.59            | 17.17<br>11.49<br>3.090-<br>30.10            | 6.500<br>7.100<br>3.20-<br>9.100  | 18.60<br>19.35<br>10.70-<br>25.95            | 22.512<br>0.55<br>10.20-<br>30.45            | HC for BC vs BC I, P < 0.05;<br><br>HC for CC vs CC I P < 0.001, HC for CC vs CC II P < 0.01          |
| TFPI                                                 | 10.93<br>7.70<br>2.950-<br>16.00  | 10.88<br>8.10<br>2.95<br>17.66               | 6.347<br>2.680<br>1.800-<br>10.63            | 6.710<br>5.750<br>2.020-<br>7.850 | 5.629<br>4.60<br>2.050-<br>8.650             | 4.731<br>3.550<br>1.100-<br>8.050            |                                                                                                       |
| TF/TFPI                                              | 1.670<br>1.423<br>0.497-<br>2.678 | 6.721<br>2.600<br>0.800-<br>5.100<br><br>32% | 7.223<br>2.220<br>1.130-<br>9.250<br><br>32% | 3.613<br>1.415<br>0.560-<br>7.130 | 7.573<br>2.865<br>1.315-<br>13.25<br><br>24% | 9.066<br>3.960<br>1.460-<br>8.750<br><br>19% |                                                                                                       |
| % Above max value of relative HC                     |                                   |                                              |                                              |                                   |                                              |                                              |                                                                                                       |
| EPCR                                                 | 3.722<br>3.000<br>1.850-<br>5.700 | 18.02<br>18.38<br>7.055-<br>25.18            | 14.17<br>8.525<br>2.850-<br>14.43            | 3.764<br>2.750<br>1.450-<br>6.450 | 15.01<br>8.850<br>2.900-<br>20.70            | 13.37<br>10.95<br>4.900-<br>20.35            | HC for BC vs BC I, P < 0.05<br><br>HC for CC vs CC I, P < 0.05                                        |
| <b>Growth factor receptors:</b><br>VEGF R1(FLT1)     | 15.12<br>14.90<br>0.700-<br>28.00 | 52.41<br>47.41<br>16.45-<br>91.48            | 48.67<br>37.00<br>11.25-<br>88.53            | 16.74<br>13.00<br>3.300-<br>30.35 | 45.90<br>44.90<br>31.05-<br>57.85            | 45.09<br>44.60<br>26.90-<br>63.30            | HC FOR BC VS: BC I, P < 0.001<br>BCII, P < 0.01<br><br>HC for CC vs: CC I, P < 0.05<br>CCII, P < 0.05 |

|              |        |        |        |        |        |        |                                 |
|--------------|--------|--------|--------|--------|--------|--------|---------------------------------|
| VEGF R2(KDR) | 11.01  | 37.94  | 36.48  | 6.029  | 26.93  | 20.32  | HC FOR BC VS: BC I,<br>P < 0.01 |
|              | 7.350  | 39.90  | 33.31  | 5.000  | 30.70  | 13.50  |                                 |
|              | 3.850- | 15.32- | 22.58- | 4.000- | 19.75- | 6.850- | BCII, P < 0.01                  |
|              | 14.00  | 56.66  | 42.97  | 9.700  | 33.40  | 30.85  | HC for CC vs CC I, P<br>< 0.01  |
